# Supplementary material
Source: PubMed Central journal article supplement (PMC4066494)
Supplement: 1324105111_pnas.201324105SI.pdf [file 1324105111_pnas.201324105SI.pdf]

# Supporting Information

Kuroki et al. 10.1073/pnas.1324105111

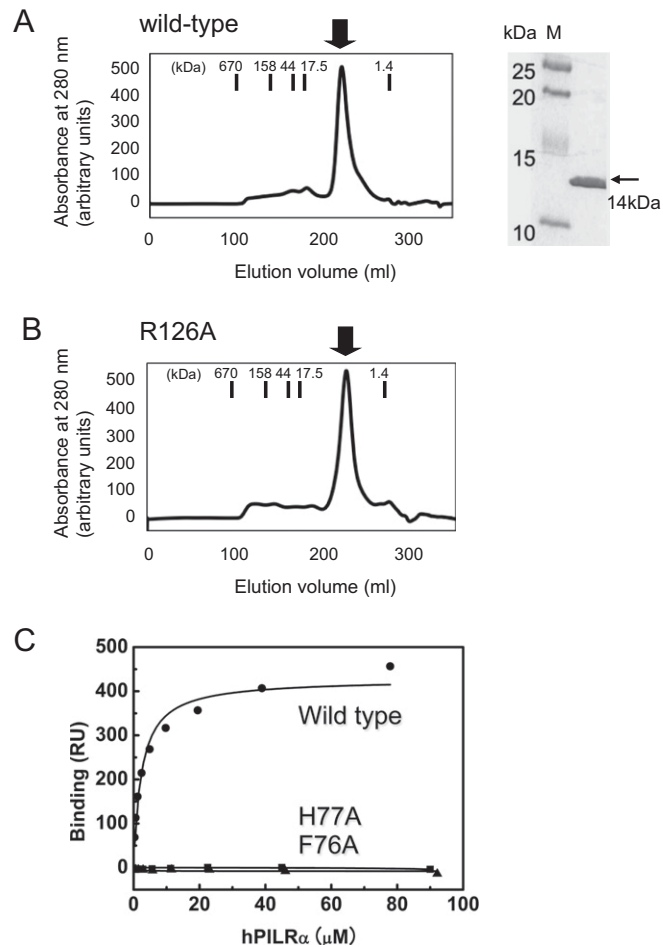

**Fig. S1.** Preparation and surface plasmon resonance (SPR) binding study of paired Ig-like type 2 receptor alpha (PILR $\alpha$ ). (A and B) Gel filtration of wild-type (A) and mutant (B) refolded PILR $\alpha$ . The arrows indicate the peaks of the PILR $\alpha$  proteins, showing the mass of their monomeric form. SDS/PAGE also shows a single band in the wild-type PILR $\alpha$ , demonstrating a mass of 14 kDa consistent with the calculated molecular mass (Right). (C) Representative SPR binding studies with HSV glycoprotein B (gB) of wild-type PILR $\alpha$  (closed circles) and the H77A and F76A mutants (closed squares and triangles, respectively). Responses at serial concentrations of PILR $\alpha$  proteins were determined and fitted by the 1:1 Langmuir binding model. RU, resonance units.



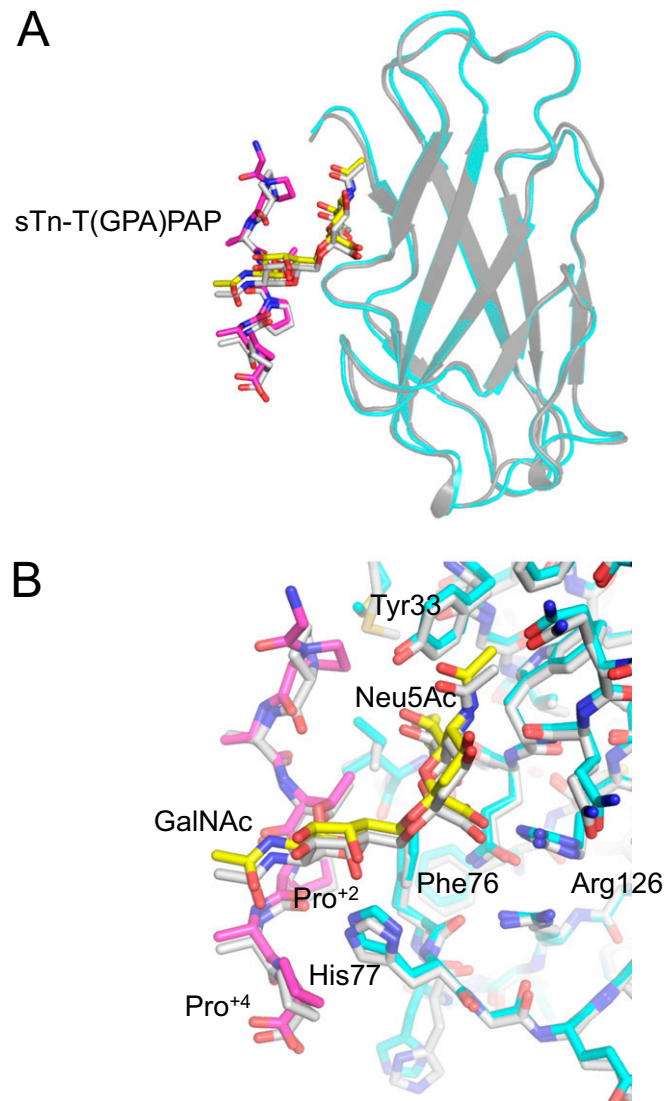

**Fig. S3.** Structural comparison of two PILR $\alpha$ -sugar T antigen (sTn) peptide complexes in the asymmetric unit. (A) Cartoon model showing the structure of PILR $\alpha$ -sTn peptide complex A (cyan) and B (gray). A stick model of bound sTn peptide [GPAT(sTn)PAP] in the A complex is shown (peptide region: magenta; glycan: yellow). The rmsd difference between these structures is 0.57 Å. (B) Detailed view of the interaction sites. These complexes are essentially the same, and therefore we focus on complex A in the main text.

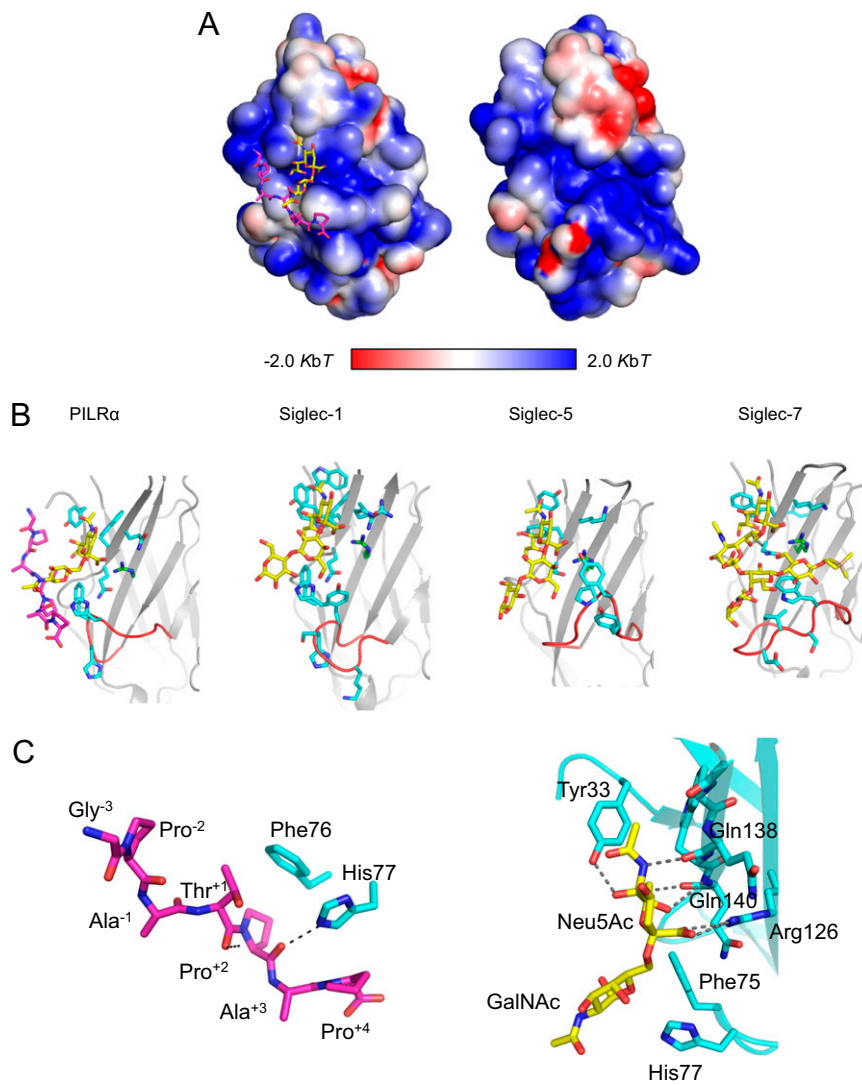

**Fig. 54.** (A) Representation of the surface potential of complex (*Left*) and free (*Right*) PILR $\alpha$ , with carbohydrate moieties shown as sticks. (B) Structural comparison of the sugar-recognition modes of PILR $\alpha$  (*Left*) and sialic acid-binding Ig-like lectin (Siglec) family members Siglec-1 (*Center Left*), -5 (*Center Right*), and -7 (*Right*). The CC' loops with a part of the D strand are represented in red. The proteins are shown in cartoon style, and ligand sugars are shown as dark blue-based stick models. The green residues correspond to "essential R." (C) Detailed interaction of the peptide and sTn with PILR $\alpha$ .



**Table S1. Data collection and refinement statistics**

| Crystallographic parameters                                      | PILR $\alpha$ -sTn peptide complex | Free form of PILR $\alpha$                    |
|------------------------------------------------------------------|------------------------------------|-----------------------------------------------|
| <b>Data collection</b>                                           |                                    |                                               |
| Space group                                                      | C222 <sub>1</sub>                  | P2 <sub>1</sub> 2 <sub>1</sub> 2 <sub>1</sub> |
| Cell dimensions                                                  |                                    |                                               |
| <i>a</i> , <i>b</i> , <i>c</i> , Å                               | 50.27, 155.80, 67.31               | 40.33, 44.94, 56.87                           |
| Resolution, Å <sup>*,†</sup>                                     | 20–2.30 (2.42–2.30)                | 20–1.3 (1.33–1.30)                            |
| <i>R</i> <sub>merge</sub> <sup>†</sup>                           | 0.168 (0.567)                      | 0.058 (0.375)                                 |
| <i>I</i> / <i>σ</i> <sup>†</sup>                                 | 10.5 (3.1)                         | 13.1 (4.1)                                    |
| Completeness, % <sup>†</sup>                                     | 99.7 (99.7)                        | 99.9 (99.8)                                   |
| Redundancy <sup>†</sup>                                          | 6.9 (5.1)                          | 7.0 (6.8)                                     |
| <b>Refinement</b>                                                |                                    |                                               |
| Resolution, Å                                                    | 20–2.30 (2.37–2.30)                | 20–1.3 (1.33–1.30)                            |
| No. of unique reflections                                        | 12,109                             | 24,742                                        |
| <i>R</i> <sub>work</sub> / <i>R</i> <sub>free</sub> <sup>‡</sup> | 0.231/0.299                        | 0.144/0.177                                   |
| <b>No. atoms</b>                                                 |                                    |                                               |
| Protein                                                          | 1,962                              | 1,004                                         |
| Ligand/ion                                                       | 190                                | 30                                            |
| Water                                                            | 162                                | 93                                            |
| <b>B-factors, Å<sup>2</sup></b>                                  |                                    |                                               |
| Protein                                                          | 16.7                               | 17.4                                          |
| Ligand/ion                                                       | 26.7                               | 22.4                                          |
| Water                                                            | 19.3                               | 25.7                                          |
| <b>Rmsd</b>                                                      |                                    |                                               |
| Bond lengths, Å                                                  | 0.0064                             | 0.012                                         |
| Bond angles, °                                                   | 1.23                               | 1.47                                          |
| <b>Ramachandran plot<sup>§</sup></b>                             |                                    |                                               |
| Most favored                                                     | 230 (94.7%)                        | 113 (95.8%)                                   |
| Additional allowed                                               | 13 (5.3%)                          | 5 (4.2%)                                      |
| Disallowed                                                       | 0 (0%)                             | 0 (0%)                                        |

\*One crystal was used.

<sup>†</sup>Highest-resolution shell is shown in parenthesis.

<sup>‡</sup>Of the total reflections, 5.0% were held aside for *R*<sub>free</sub> throughout refinement.

<sup>§</sup>Analyzed by RAMPAGE (1).

1. Lovell SC, et al. (2003) Structure validation by C $\alpha$  geometry:  $\phi$ ,  $\psi$  and C $\beta$  deviation. *Proteins* 50(3):437–450.

**Table S2. Intermolecular contacts (located within 4 Å) in PILR $\alpha$ -sTn peptide complex**

| Ligand. gB                                 | PILR $\alpha$         | Distance, Å |
|--------------------------------------------|-----------------------|-------------|
| van der Waals interaction (intermolecular) |                       |             |
| Pro <sup>-2</sup> C $\delta$               | Met31 C $\epsilon$    | 3.4         |
| Pro <sup>-2</sup> C $\beta$                | Met31 C $\epsilon$    | 3.4         |
| Pro <sup>-2</sup> C $\gamma$               | Met31 C $\epsilon$    | 3.3         |
| Pro <sup>-2</sup> C $\delta$               | Tyr33 OH              | 3.4         |
| Pro <sup>-2</sup> C $\gamma$               | Tyr33 OH              | 3.9         |
| Pro <sup>-2</sup> C $\beta$                | Ile142 C $\delta$ 1   | 3.8         |
| Pro <sup>-2</sup> C $\gamma$               | Ile142 C $\delta$ 1   | 3.9         |
| Ala <sup>-1</sup> O                        | Ile142 C $\delta$ 1   | 3.8         |
| Ala <sup>-1</sup> O                        | Ile142 C $\gamma$ 2   | 3.9         |
| Pro <sup>+2</sup> C $\delta$               | Phe76 C $\gamma$      | 3.9         |
| Pro <sup>+2</sup> C $\delta$               | Phe76 C $\delta$ 2    | 3.8         |
| Pro <sup>+2</sup> C $\gamma$               | Phe76 C $\beta$       | 3.4         |
| Pro <sup>+2</sup> C $\gamma$               | Phe76 C $\gamma$      | 3.4         |
| Pro <sup>+2</sup> C $\gamma$               | Phe76 C $\delta$ 1    | 4.0         |
| Pro <sup>+2</sup> C $\gamma$               | Phe76 C $\delta$ 2    | 3.8         |
| Pro <sup>+2</sup> C                        | His77 N $\epsilon$ 2  | 3.8         |
| Pro <sup>+2</sup> O                        | Phe76 C $\delta$ 2    | 3.4         |
| Pro <sup>+4</sup> N                        | Phe76 N $\epsilon$ 2  | 3.9         |
| Pro <sup>+4</sup> N                        | Phe76 N $\delta$ 2    | 3.9         |
| Pro <sup>+4</sup> C $\alpha$               | Phe76 N $\delta$ 2    | 3.7         |
| Pro <sup>+4</sup> C $\beta$                | Phe76 N $\delta$ 2    | 4.0         |
| Neu5Ac C10                                 | Tyr33 C $\epsilon$ 2  | 4.0         |
| Neu5Ac C10                                 | Tyr33 C $\zeta$       | 3.6         |
| Neu5Ac C11                                 | Tyr33 C $\delta$ 2    | 4.0         |
| Neu5Ac C11                                 | Tyr33 C $\epsilon$ 2  | 3.7         |
| Neu5Ac C11                                 | Tyr33 C $\zeta$       | 3.8         |
| Neu5Ac C11                                 | Trp139 CH2            | 3.8         |
| Neu5Ac C11                                 | Gln138 O              | 3.8         |
| Neu5Ac C11                                 | Gln137 O $\epsilon$ 1 | 3.2         |
| Neu5Ac C7                                  | Trp139 C $\beta$      | 3.8         |
| Neu5Ac C7                                  | Tyr33 C $\epsilon$ 1  | 3.7         |
| Neu5Ac O7                                  | Tyr33 C $\epsilon$ 1  | 3.7         |
| Neu5Ac O7                                  | Tyr33 C $\zeta$       | 3.6         |
| Neu5Ac O8                                  | Trp139 C $\alpha$     | 3.7         |
| Neu5Ac O8                                  | Trp139 C $\beta$      | 3.9         |
| Neu5Ac O8                                  | Gln137 O $\gamma$     | 3.9         |
| Neu5Ac O8                                  | Phe76 C $\zeta$       | 3.8         |
| Neu5Ac C9                                  | Gln140 O              | 3.4         |
| Neu5Ac C9                                  | Trp139 C $\beta$      | 3.6         |
| Neu5Ac C9                                  | Gln140 N              | 3.9         |
| Neu5Ac C9                                  | Tyr33 C $\epsilon$ 1  | 3.5         |
| Neu5Ac O9                                  | Ile142 C $\gamma$ 1   | 2.9         |
| Neu5Ac O9                                  | Ile142 C $\delta$ 1   | 3.2         |
| GalNAc C1                                  | His77 N $\epsilon$ 2  | 4.0         |
| GalNAc C1                                  | His77 C $\epsilon$ 1  | 4.0         |
| GalNAc C6                                  | His77 C $\epsilon$ 1  | 4.0         |
| GalNAc O5                                  | Phe76 C $\epsilon$ 1  | 4.0         |
| GalNAc O5                                  | His77 C $\epsilon$ 1  | 3.1         |
| Hydrogen bond (intermolecular)             |                       |             |
| Pro <sup>+2</sup> O                        | His77 N $\epsilon$ 2  | 2.6         |
| Neu5Ac O1 $\alpha$                         | Arg126 NH1            | 2.9         |
| Neu5Ac O1 $\beta$                          | Arg126 NH2            | 2.7         |
| Neu5Ac N5                                  | Gln138 O              | 2.7         |
| Neu5Ac O7                                  | Tyr33 OH              | 2.7         |
| Neu5Ac O10                                 | Tyr33 OH              | 3.1         |
| Neu5Ac O8                                  | Gln140 N              | 3.4         |
| Neu5Ac O9                                  | Gln140 O              | 3.1         |

**Table S3. Binding affinities of wild-type and mutant PILR $\alpha$  proteins for HSV-1 gB, determined by SPR**

| Analyte | $K_d$ , $\mu$ M | Analyte | $K_d$ , $\mu$ M |
|---------|-----------------|---------|-----------------|
| WT      | 2.3 $\pm$ 0.1   | V122A   | 2.3 $\pm$ 0.1   |
| L32A    | 1.6 $\pm$ 0.1   | F124A   | 44 $\pm$ 2.2    |
| Y33A    | 13 $\pm$ 0.4    | R126A   | No binding      |
| Y57A    | 6.0 $\pm$ 0.1   | E128A   | 1.5 $\pm$ 0.1   |
| P58A    | 2.3 $\pm$ 0.0   | T131A   | 8.3 $\pm$ 0.3   |
| W59A    | 7.7 $\pm$ 0.2   | S134A   | 2.4 $\pm$ 0.2   |
| R68A    | 2.3 $\pm$ 0.1   | Q137A   | 4.1 $\pm$ 0.3   |
| S70A    | 2.5 $\pm$ 0.2   | Q138A   | 2.7 $\pm$ 0.3   |
| R72A    | 178 $\pm$ 8.3   | W139A   | 134 $\pm$ 5.0   |
| H75A    | 29 $\pm$ 1.0    | Q140A   | 40 $\pm$ 0.9    |
| F76A    | No binding      | S141A   | 3.0 $\pm$ 0.2   |
| H77A    | No binding      | I142A   | 23 $\pm$ 0.8    |
| Q79A    | 2.6 $\pm$ 0.2   | E143A   | 1.2 $\pm$ 0.0   |
| S88A    | 2.8 $\pm$ 0.1   | K146A   | 3.1 $\pm$ 0.0   |
| Q105A   | 2.8 $\pm$ 0.1   |         |                 |

$K_d$ s were determined by equilibrium-binding experiments using SPR. Representative examples are shown in Fig. S1.
